# Supplementary material for: Loop Diuretics Are Associated with Increased Risk of Hospital-Acquired Acute Kidney Injury in Adult Patients: A Retrospective Study
Source: MDPI journal article supplement (doi:10.3390/jcm11133665), 2022-06-24
Supplement: s1 [file s1]

## *Supplementary Material*

**Table S1.** Proportion of diuretics subtypes.

| Subgroup                                           | ATC code                             | N (%)                |
|----------------------------------------------------|--------------------------------------|----------------------|
| Diuretics                                          | C03/B05BC                            | 35,223 (23.5)        |
| <b>Loop diuretics</b>                              | <b>C03CA</b>                         | <b>16,437 (11.0)</b> |
| Furosemide                                         | C03CA01                              | 15,489 (94.2)        |
| Turasemide                                         | C03CA04                              | 948 (5.8)            |
| <b>Other diuretics*</b>                            | <b>C03AA/C03BA/C03DA/C03DB/B05BC</b> | <b>18,768 (12.5)</b> |
| <b>Thiazides</b>                                   | <b>C03AA</b>                         | <b>243 (0.2)</b>     |
| Hydrochlorothiazide                                | C03AA03                              | 243 (100)            |
| <b>Low-ceiling diuretics (excluding thiazides)</b> | <b>C03B</b>                          | <b>486 (0.3)</b>     |
| indapamide                                         | C03BA11                              | 486 (100)            |
| <b>Potassium-sparing diuretics</b>                 | <b>C03D</b>                          | <b>888 (0.6)</b>     |
| spironolactone                                     | C03DA01                              | 781 (88.0)           |
| amiloride                                          | C03DB01                              | 110 (12.4)           |
| <b>osmotic diuretics</b>                           | <b>B05BC</b>                         | <b>17,151 (11.4)</b> |
| mannitol                                           | B05BC01                              | 17,103 (99.7)        |
| carbamide                                          | B05BC02                              | 51 (0.3)             |

**Abbreviation:** ATC, Anatomical Therapeutic Chemical classification.

\* Other diuretics include thiazide, Low-ceiling (excluding thiazides), potassium-sparing and osmotic diuretics.

**Table S2.** Characteristics of the included and the excluded adults with prescription data.

| Characteristic                | Included adults    | Excluded adults with<br>prescription data | Standardized<br>Difference |
|-------------------------------|--------------------|-------------------------------------------|----------------------------|
| N                             | 150,020            | 254,491                                   |                            |
| Age, year                     | 53.0 [41.9, 63.8]  | 51.4 [37.4, 63.2]                         | 0.11                       |
| Male, n (%)                   | 79,638 (53.1)      | 128,461 (50.5)                            | 0.05                       |
| Number of SCr tests           | 2.4±2.5            | 1.3±1.6                                   | 0.53                       |
| Length of stay, day           | 13.0 [9.0, 20.0]   | 8.0 [5.0, 11.0]                           | 0.60                       |
| Daily cost, CNY               | 2,255 [1149, 3575] | 1,257 [812, 2159]                         | 0.30                       |
| In-hospital death, n (%)      | 852 (0.6)          | 529 (0.2)                                 | 0.06                       |
| CCI                           | 3.0 [2.0, 4.0]     | 3.0 [1.0, 4.0]                            | 0.16                       |
| ICU, n (%)                    | 9,358 (6.2)        | 9,892 (3.9)                               | 0.11                       |
| Mechanical ventilation, n (%) | 212 (0.1)          | 102 (0.0)                                 | 0.03                       |
| Comorbidity, n (%)            |                    |                                           |                            |
| Hypertension                  | 8,201 (5.5)        | 18,668 (7.3)                              | 0.08                       |
| Heart failure                 | 923 (0.6)          | 3,148 (1.2)                               | 0.06                       |
| Congenital heart disease      | 360 (0.2)          | 940 (0.4)                                 | 0.02                       |
| CHD                           | 5,787 (3.9)        | 14,113 (5.5)                              | 0.08                       |
| Cerebral disease              | 3,886 (2.6)        | 2,802 (1.1)                               | 0.11                       |
| Stroke                        | 7,715 (5.1)        | 11,086 (4.4)                              | 0.04                       |
| CVD                           | 8,783 (5.9)        | 12,841 (5.0)                              | 0.04                       |
| Primary nephritis             | 936 (0.6)          | 2,214 (0.9)                               | 0.03                       |
| CKD                           | 3,906 (2.6)        | 6,127 (2.4)                               | 0.01                       |
| Nephrotic syndrome            | 1,745 (1.2)        | 3,601 (1.4)                               | 0.02                       |
| Urinary tract infection       | 1,195 (0.8)        | 1,333 (0.5)                               | 0.03                       |
| CUSM                          | 245 (0.2)          | 161 (0.1)                                 | 0.03                       |
| Diabetes                      | 4,249 (2.8)        | 6,771 (2.7)                               | 0.01                       |
| SLE                           | 1,045 (0.7)        | 1,419 (0.6)                               | 0.02                       |
| Hepatitis                     | 5,410 (3.6)        | 5,414 (2.1)                               | 0.09                       |
| Liver cirrhosis               | 2,223 (1.5)        | 2,513 (1.0)                               | 0.05                       |
| GIB                           | 1,629 (1.1)        | 1,945 (0.8)                               | 0.03                       |
| Respiratory infection         | 9,382 (6.3)        | 11,177 (4.4)                              | 0.08                       |
| COPD                          | 2,459 (1.6)        | 3,765 (1.5)                               | 0.01                       |
| Diarrhea/vomiting             | 273 (0.2)          | 611 (0.2)                                 | 0.01                       |
| Sepsis                        | 598 (0.4)          | 427 (0.2)                                 | 0.04                       |
| Shock                         | 734 (0.5)          | 543 (0.2)                                 | 0.05                       |
| Trauma                        | 6,598 (4.4)        | 7,614 (3.0)                               | 0.08                       |
| Burn                          | 512 (0.3)          | 853 (0.3)                                 | 0.00                       |
| Malignant solid tumor         | 39,370 (26.2)      | 47,266 (18.6)                             | 0.19                       |
| Hematological malignancy      | 3,737 (2.5)        | 3,151 (1.2)                               | 0.09                       |
| Hepatic carcinoma             | 5,101 (3.4)        | 4,976 (2.0)                               | 0.09                       |
| Receiving operation, n (%)    | 85,598 (57.1)      | 95,927 (37.7)                             | 0.40                       |

|                                 |                |                |      |
|---------------------------------|----------------|----------------|------|
| Gastrointestinal operation      | 18,502 (12.3)  | 8,634 (3.4)    | 0.34 |
| Cardiac respiratory operation   | 8,321 (5.5)    | 7,134 (2.8)    | 0.14 |
| Neurosurgical operation         | 7,600 (5.1)    | 2,508 (1.0)    | 0.24 |
| Orthopedic operation            | 20,936 (14.0)  | 17,625 (6.9)   | 0.23 |
| Urinary system operation        | 5,114 (3.4)    | 2,411 (0.9)    | 0.17 |
| Interventional operation        | 7,829 (5.2)    | 18,793 (7.4)   | 0.09 |
| Medication use, n (%)           |                |                |      |
| ACEI                            | 5,013 (3.3)    | 12,013 (4.7)   | 0.07 |
| ARB                             | 9,513 (6.3)    | 24,190 (9.5)   | 0.12 |
| Chemotherapy agents             | 22,167 (14.8)  | 33,897 (13.3)  | 0.04 |
| Contrast medium                 | 1,185 (0.8)    | 652 (0.3)      | 0.07 |
| Glucocorticoid                  | 39,433 (26.3)  | 53,872 (21.2)  | 0.12 |
| NSAIDs                          | 67,089 (44.7)  | 86,209 (33.9)  | 0.22 |
| PPI                             | 114,385 (76.2) | 123,865 (48.7) | 0.59 |
| Antimycotics                    | 4,219 (2.8)    | 2,044 (0.8)    | 0.15 |
| Anti-tuberculosis drugs         | 2,002 (1.3)    | 1,036 (0.4)    | 0.10 |
| Antiviral drugs                 | 6,457 (4.3)    | 7,174 (2.8)    | 0.08 |
| Aminoglycoside                  | 4,754 (3.2)    | 2,691 (1.1)    | 0.15 |
| Sulfonamides                    | 609 (0.4)      | 469 (0.2)      | 0.04 |
| First-generation cephalosporins | 1,890 (1.3)    | 4,201 (1.7)    | 0.03 |
| Semi-synthetic penicillin       | 34,843 (23.2)  | 23,185 (9.1)   | 0.39 |

**Note:** number of SCr tests is presented in mean±SD; values expressed with number and a round bracket are presented as median [25th, 75th quartiles]; values expressed with number and a square bracket are presented as count (percentage).

**Abbreviation:** SCr, serum creatinine; AKI, acute kidney injury; CNY, Chinese Yuan; CCI, charlson comorbidity index; ICU, need for admission to the intensive care unit; CHD, coronary heart disease; CVD, cardiovascular disease; CKD, chronic kidney disease; CUSM, congenital urinary system malformation; SLE, systemic lupus erythematosus; GIB, gastrointestinal bleeding; COPD, chronic obstructive pulmonary disease; ACEI, angiotensin-converting enzyme inhibitor; ARB, angiotensin receptor blocker; NSAIDs, non-steroid anti-inflammatory drugs; PPI, proton pump inhibitor.

**Table S3.** The association between treatment with furosemide and risk of HA-AKI.

| Subgroup          |        |                       | Crude Model       |         | Adjusted Model 1  |         | Adjusted Model 2  |         | Adjusted Model 3  |         |
|-------------------|--------|-----------------------|-------------------|---------|-------------------|---------|-------------------|---------|-------------------|---------|
|                   |        |                       | HR (95% CI)       | P value |
| Furosemide        | Versus | Non-users             |                   |         |                   |         |                   |         |                   |         |
| Non-users         |        | 3,262 / 11,4815 (2.8) | Ref.              |         | Ref.              |         | Ref.              |         | Ref.              |         |
| Furosemide        |        | 1,540 / 15,489 (9.9)  | 3.14 (3.03, 3.26) | <0.001  | 2.90 (2.80, 3.00) | <0.001  | 2.19 (2.11, 2.27) | <0.001  | 1.63 (1.57, 1.69) | <0.001  |
| Furosemide        | Versus | Other diuretics*      |                   |         |                   |         |                   |         |                   |         |
| Other diuretics   |        | 823 / 18,768 (4.4)    | Ref.              |         | Ref.              |         | Ref.              |         | Ref.              |         |
| Furosemide        |        | 1,540 / 15,489 (9.9)  | 2.40 (2.29, 2.51) | <0.001  | 2.28 (2.18, 2.39) | <0.001  | 1.70 (1.62, 1.79) | <0.001  | 1.33 (1.24, 1.42) | <0.001  |
| Furosemide        | Versus | Osmotic diuretics     |                   |         |                   |         |                   |         |                   |         |
| Osmotic diuretics |        | 714 / 17,151 (4.2)    | Ref.              |         | Ref.              |         | Ref.              |         | Ref.              |         |
| Furosemide        |        | 1,540 / 15,489 (9.9)  | 2.17 (2.08, 2.28) | <0.001  | 1.99 (1.89, 2.08) | <0.001  | 1.54 (1.47, 1.61) | <0.001  | 1.11 (1.05, 1.18) | <0.001  |
| Furosemide        | Versus | Torasemide            |                   |         |                   |         |                   |         |                   |         |
| Torasemide        |        | 92 / 948 (9.7)        | Ref.              |         | Ref.              |         | Ref.              |         | Ref.              |         |
| Furosemide        |        | 1,540 / 15,489 (9.9)  | 1.63 (1.41, 1.88) | <0.001  | 1.60 (1.38, 1.84) | <0.001  | 1.65 (1.43, 1.91) | <0.001  | 1.33 (1.14, 1.54) | <0.001  |

Abbreviation: HA-AKI, hospital-acquired acute kidney injury; HR, hazard ratio; CI, confidence interval; Ref, reference.

\* Other diuretics include thiazide, Low-ceiling (excluding thiazides), potassium-sparing and osmotic diuretics.

Model 1, adjusted for age, gender; Model 2, adjusted for estimated glomerular filtration rate (eGFR) and number of SCr tests, in addition to the variables in Model 1; Model 3, adjusted for the variables in Model 2, along with the Charlson comorbidity Index score, need for admission to the intensive care unit, mechanical ventilation, comorbidities, surgical procedures, use of other nephrotoxic drugs, and stratified by hospitals and divisions.

**Table S4.** The association between loop diuretics versus non-users and risk of HA-AKI in various subgroups.

| Subgroup                  | Loop diuretics        | Non-users             | Adjusted HR* (95% CI) | P for interaction |
|---------------------------|-----------------------|-----------------------|-----------------------|-------------------|
|                           | HA-AKI/ Total (%)     | HA-AKI/ Total (%)     |                       |                   |
| <b>Age</b>                |                       |                       |                       | <0.001            |
| 18-40 year                | 192 / 2,332 (8.2)     | 551 / 27,001 (2.0)    | 1.54 (1.42, 1.68)     |                   |
| 40-65 year                | 815 / 8,815 (9.2)     | 1,803 / 62,635 (2.9)  | 1.59 (1.51, 1.67)     |                   |
| 65-100 year               | 625 / 5,290 (11.8)    | 908 / 25,179 (3.6)    | 1.75 (1.66, 1.85)     |                   |
| <b>Gender</b>             |                       |                       |                       | <0.001            |
| Male                      | 1,089 / 10,284 (10.6) | 2,051 / 58,406 (3.5)  | 1.54 (1.47, 1.61)     |                   |
| Female                    | 543 / 6,153 (8.8)     | 1,211 / 56,409 (2.1)  | 1.87 (1.76, 1.98)     |                   |
| <b>Primary nephritis</b>  |                       |                       |                       | 0.85              |
| Yes                       | 12 / 119 (10.1)       | 23 / 790 (2.9)        | 1.69 (1.13, 2.52)     |                   |
| No                        | 1,620 / 16,318 (9.9)  | 3,239 / 114,025 (2.8) | 1.64 (1.58, 1.70)     |                   |
| <b>Nephrotic syndrome</b> |                       |                       |                       | 0.58              |
| Yes                       | 46 / 367 (12.5)       | 68 / 1,309 (5.2)      | 1.73 (1.41, 2.12)     |                   |
| No                        | 1,586 / 16,070 (9.9)  | 3,194 / 113,506 (2.8) | 1.64 (1.57, 1.70)     |                   |
| <b>Hypertension</b>       |                       |                       |                       | <0.001            |
| Yes                       | 99 / 941 (10.5)       | 220 / 6,562 (2.8)     | 1.23 (1.08, 1.40)     |                   |
| No                        | 1,533 / 15,496 (9.9)  | 3,042 / 108,253 (2.8) | 1.67 (1.61, 1.74)     |                   |
| <b>Heart failure</b>      |                       |                       |                       | 0.004             |
| Yes                       | 87 / 352 (24.7)       | 53 / 507 (10.5)       | 1.28 (1.09, 1.52)     |                   |
| No                        | 1,545 / 16,085 (9.6)  | 3,209 / 114,308 (2.8) | 1.65 (1.59, 1.72)     |                   |
| <b>Liver cirrhosis</b>    |                       |                       |                       | 0.003             |
| Yes                       | 50 / 693 (7.2)        | 83 / 1,439 (5.8)      | 1.22 (1.00, 1.50)     |                   |
| No                        | 1,582 / 15,744 (10.0) | 3,179 / 113,376 (2.8) | 1.65 (1.58, 1.71)     |                   |
| <b>ICU</b>                |                       |                       |                       | 0.66              |
| Yes                       | 242 / 1,404 (17.2)    | 268 / 5,216 (5.1)     | 1.66 (1.51, 1.83)     |                   |
| No                        | 1,490 / 15,033 (9.9)  | 2,994 / 109,599 (2.7) | 1.63 (1.57, 1.70)     |                   |
| <b>Operation</b>          |                       |                       |                       | <0.001            |
| Yes                       | 801 / 9,747 (8.2)     | 1,482 / 64,196 (2.3)  | 1.47 (1.38, 1.56)     |                   |
| No                        | 831 / 6,690 (12.4)    | 1,780 / 50,619 (3.5)  | 1.76 (1.68, 1.84)     |                   |
| <b>ACEI/ARB</b>           |                       |                       |                       | 0.56              |
| Yes                       | 200 / 1,756 (11.4)    | 312 / 10,130 (3.1)    | 1.58 (1.43, 1.75)     |                   |
| No                        | 1,432 / 14,681 (9.7)  | 2,950 / 104,685 (2.8) | 1.65 (1.58, 1.71)     |                   |

Abbreviation: HA-AKI, hospital-acquired acute kidney injury; HR, hazard ratio; CI, confidence interval; ICU, need for admission to the intensive care unit; ACEI, angiotensin-converting enzyme inhibitor; ARB, angiotensin receptor blocker.

\*adjusted for age, gender, estimated glomerular filtration rate, number of serum creatinine tests, Charlson comorbidity Index score, need for admission to the intensive care unit, mechanical ventilation, comorbidities, surgical procedures, use of other nephrotoxic drugs, and stratified by hospitals and divisions.

**Table S5.** The association between loop diuretics versus non-users and risk of HA-AKI in the 1:1 propensity score-matched cohorts (Method 1).

| Subgroup          | HA-AKI / N, (%)      |                   | Crude Model       |         | Adjusted Model 1  |         | Adjusted Model 2  |         | Adjusted Model 3  |         |
|-------------------|----------------------|-------------------|-------------------|---------|-------------------|---------|-------------------|---------|-------------------|---------|
|                   |                      |                   | HR (95% CI)       | P value |
| Loop diuretics    | Matched              | Non-users         |                   |         |                   |         |                   |         |                   |         |
| Non-users         | 734 / 14,490 (5.1)   |                   | Ref.              |         | Ref.              |         | Ref.              |         | Ref.              |         |
| Loop diuretics    | 1,375 / 14,490 (9.5) |                   | 1.75 (1.68, 1.83) | <0.001  | 1.13 (1.03, 1.23) | <0.001  | 1.73 (1.66, 1.81) | <0.001  | 1.52 (1.45, 1.59) | <0.001  |
| Loop diuretics    | Matched              | Other diuretics*  |                   |         |                   |         |                   |         |                   |         |
| Other diuretics   | 266 / 3,655 (7.3)    |                   | Ref.              |         | Ref.              |         | Ref.              |         | Ref.              |         |
| Loop diuretics    | 341 / 3,655 (9.3)    |                   | 1.12 (1.03, 1.23) | 0.009   | 1.13 (1.03, 1.23) | <0.001  | 1.11 (1.01, 1.21) | <0.001  | 1.21 (1.10, 1.34) | <0.001  |
| Loop diuretics    | Matched              | Osmotic diuretics |                   |         |                   |         |                   |         |                   |         |
| Osmotic diuretics | 149 / 2,272 (6.6)    |                   | Ref.              |         | Ref.              |         | Ref.              |         | Ref.              |         |
| Loop diuretics    | 208 / 2,272 (9.2)    |                   | 1.28 (1.15, 1.41) | <0.001  | 1.26 (1.14, 1.40) | <0.001  | 1.18 (1.07, 1.31) | <0.001  | 1.14 (1.02, 1.27) | 0.02    |

Abbreviation: HA-AKI, hospital-acquired acute kidney injury; HR, hazard ratio; CI, confidence interval; Ref, reference.

\*Other diuretics include thiazide, Low-ceiling (excluding thiazides), potassium-sparing and osmotic diuretics.

Model 1, adjusted for age, gender; Model 2, adjusted for estimated glomerular filtration rate (eGFR) and number of SCr tests, in addition to the variables in Model 1; Model 3, adjusted for the variables in Model 2, along with the Charlson comorbidity Index score, need for admission to the intensive care unit, mechanical ventilation, comorbidities, surgical procedures, use of other nephrotoxic drugs, and stratified by hospitals and divisions.

**Table S6.** The association between loop diuretics versus other diuretics and risk of HA-AKI in the 1:1 propensity score-matched cohorts (Method 2).

| Subgroup          | HA-AKI / N, (%)      |                   | Crude Model       |         | Adjusted Model 1  |         | Adjusted Model 2  |         | Adjusted Model 3  |         |
|-------------------|----------------------|-------------------|-------------------|---------|-------------------|---------|-------------------|---------|-------------------|---------|
|                   |                      |                   | HR (95% CI)       | P value |
| Loop diuretics    | Matched              | Non-users         |                   |         |                   |         |                   |         |                   |         |
| Non-users         | 754 / 14,686 (5.1)   |                   | Ref.              |         | Ref.              |         | Ref.              |         | Ref.              |         |
| Loop diuretics    | 1,388 / 14,686 (9.5) |                   | 1.72 (1.65, 1.80) | <0.001  | 1.70 (1.63, 1.78) | <0.001  | 1.45 (1.39, 1.51) | <0.001  | 1.54 (1.47, 1.62) | <0.001  |
| Loop diuretics    | Matched              | Other diuretics*  |                   |         |                   |         |                   |         |                   |         |
| Other diuretics   | 281 / 3,827 (7.3)    |                   | Ref.              |         | Ref.              |         | Ref.              |         | Ref.              |         |
| Loop diuretics    | 394 / 3,827 (10.3)   |                   | 1.39 (1.28, 1.51) | <0.001  | 1.38 (1.27, 1.50) | <0.001  | 1.29 (1.19, 1.40) | <0.001  | 1.23 (1.12, 1.35) | <0.001  |
| Loop diuretics    | Matched              | Osmotic diuretics |                   |         |                   |         |                   |         |                   |         |
| Osmotic diuretics | 178 / 2,411 (7.4)    |                   | Ref.              |         | Ref.              |         | Ref.              |         | Ref.              |         |
| Loop diuretics    | 246 / 2,411 (10.2)   |                   | 1.55 (1.42, 1.69) | 0.009   | 1.51 (1.38, 1.65) | <0.001  | 1.25 (1.15, 1.37) | <0.001  | 1.15 (1.04, 1.27) | <0.001  |

Abbreviation: HA-AKI, hospital-acquired acute kidney injury; HR, hazard ratio; CI, confidence interval; Ref, reference.

\*Other diuretics include thiazide, Low-ceiling (excluding thiazides), potassium-sparing and osmotic diuretics.

Model 1, adjusted for age, gender; Model 2, adjusted for estimated glomerular filtration rate (eGFR) and number of SCr tests, in addition to the variables in Model 1; Model 3, adjusted for the variables in Model 2, along with the Charlson comorbidity Index score, need for admission to the intensive care unit, mechanical ventilation, comorbidities, surgical procedures, use of other nephrotoxic drugs, and stratified by hospitals and divisions.

**Table S7.** The association between loop diuretics versus osmotic diuretics and risk of HA-AKI in the 1:1 propensity score-matched cohorts (Method 3).

| Subgroup          | HA-AKI / N, (%)      | Crude Model       |         | Adjusted Model 1  |         | Adjusted Model 2  |         | Adjusted Model 3  |         |
|-------------------|----------------------|-------------------|---------|-------------------|---------|-------------------|---------|-------------------|---------|
|                   |                      | HR (95% CI)       | P value |
| Loop diuretic     | Matched              | Non-users         |         |                   |         |                   |         |                   |         |
| Non-users         | 829 / 15,284 (5.4)   | Ref.              |         | Ref.              |         | Ref.              |         | Ref.              |         |
| Loop diuretics    | 1,494 / 15,284 (9.8) | 1.78 (1.71, 1.86) | <0.001  | 1.76 (1.69, 1.84) | <0.001  | 1.49 (1.43, 1.55) | <0.001  | 1.53 (1.47, 1.60) | <0.001  |
| Loop diuretics    | Matched              | Other diuretics*  |         |                   |         |                   |         |                   |         |
| Other diuretics   | 295 / 3,992 (7.4)    | Ref.              |         | Ref.              |         | Ref.              |         | Ref.              |         |
| Loop diuretics    | 389 / 3,992 (9.7)    | 1.27 (1.17, 1.37) | <0.001  | 1.26 (1.16, 1.37) | <0.001  | 1.19 (1.10, 1.29) | <0.001  | 1.15 (1.05, 1.26) | 0.002   |
| Loop diuretics    | Matched              | Osmotic diuretics |         |                   |         |                   |         |                   |         |
| Osmotic diuretics | 185 / 2,535 (7.3)    | Ref.              |         | Ref.              |         | Ref.              |         | Ref.              |         |
| Loop diuretics    | 276 / 2,535 (10.9)   | 1.43 (1.31, 1.56) | <0.001  | 1.39 (1.28, 1.52) | <0.001  | 1.22 (1.12, 1.33) | <0.001  | 1.15 (1.05, 1.27) | <0.001  |

Abbreviation: HA-AKI, hospital-acquired acute kidney injury; HR, hazard ratio; CI, confidence interval; Ref, reference.

\*Other diuretics include thiazide, Low-ceiling (excluding thiazides), potassium-sparing and osmotic diuretics. Model 1, adjusted for age, gender; Model 2, adjusted for estimated glomerular filtration rate (eGFR) and number of SCr tests, in addition to the variables in Model 1; Model 3, adjusted for the variables in Model 2, along with the Charlson comorbidity Index score, need for admission to the intensive care unit, mechanical ventilation, comorbidities, surgical procedures, use of other nephrotoxic drugs, and stratified by hospitals and divisions.



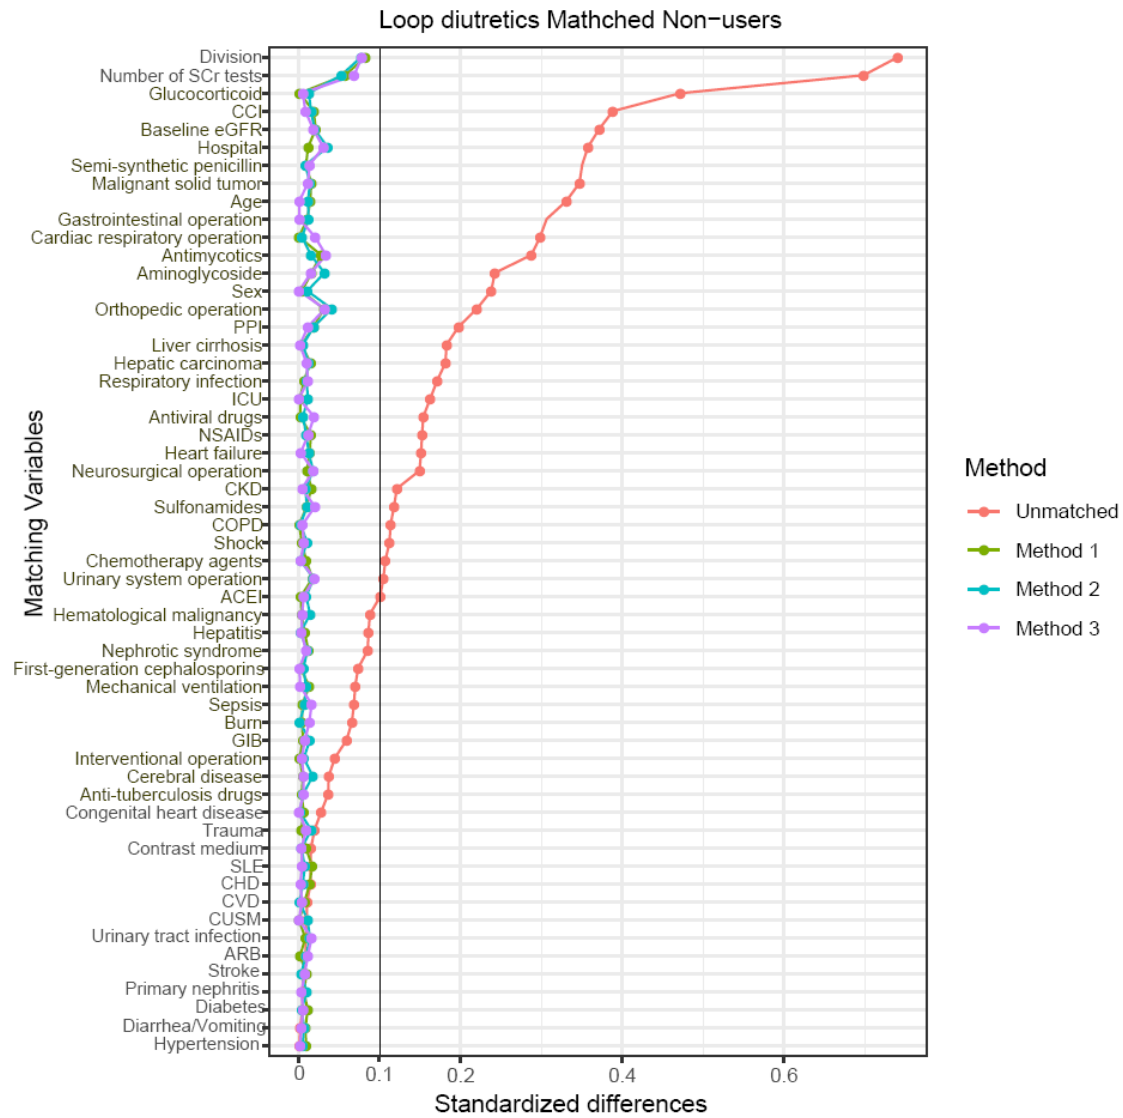

**Figure S1. Distribution of standardized differences before and after 1:1 propensity score matching by three different models between loop diuretics and non-users.** Method 1, nearest-neighbor matching without replacement and within a specified caliper width of 0.001; Method 2, nearest-neighbor matching without replacement and within a specified caliper width of 0.2 times the standard deviation of the logit of the estimated propensity score; Method 3, exact matching of age, sex, ICU, surgery, and nearest-neighbor matching without replacement and within a specified caliper width of 0.2 times the standard deviation of the logit of the estimated propensity score on other covariates. SCr, serum creatinine; CCI, Charlson comorbidity index score; eGFR, estimated glomerular filtration rate; PPI, proton pump inhibitor; ICU, need for admission to the intensive care unit; NSAIDs, non-steroid anti-inflammatory drugs; CKD, chronic kidney disease; COPD, chronic obstructive pulmonary disease; ACEI, angiotensin-converting enzyme inhibitor; GIB, gastrointestinal bleeding; SLE, systemic lupus erythematosus; CHD, coronary heart disease; CVD, cardiovascular disease; CUSM, congenital urinary system malformation; ARB, angiotensin receptor blocker.

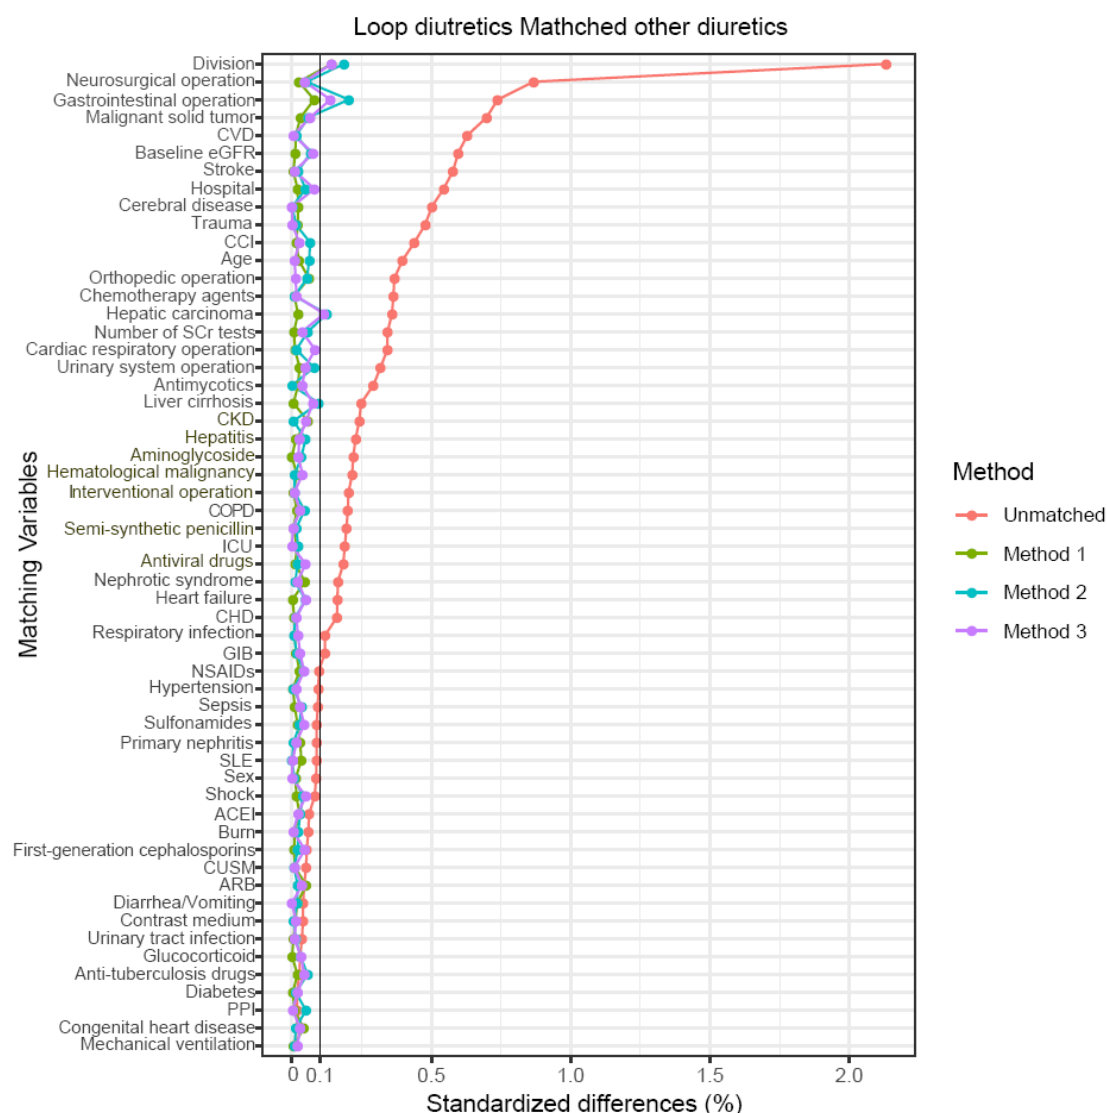

**Figure S2. Distribution of standardized differences before and after 1:1 propensity score matching by three different models between loop diuretics and other diuretics.** Method 1, nearest-neighbor matching without replacement and within a specified caliper width of 0.001; Method 2, nearest-neighbor matching without replacement and within a specified caliper width of 0.2 times the standard deviation of the logit of the estimated propensity score; Method 3, exact matching of age, sex, ICU, surgery, and nearest-neighbor matching without replacement and within a specified caliper width of 0.2 times the standard deviation of the logit of the estimated propensity score on other covariates. SCr, serum creatinine; CCI, Charlson comorbidity index score; eGFR, estimated glomerular filtration rate; PPI, proton pump inhibitor; ICU, need for admission to the intensive care unit; NSAIDs, non-steroid anti-inflammatory drugs; CKD, chronic kidney disease; COPD, chronic obstructive pulmonary disease; ACEI, angiotensin-converting enzyme inhibitor; GIB, gastrointestinal bleeding; SLE, systemic lupus erythematosus; CHD, coronary heart disease; CVD, cardiovascular disease; CUSM, congenital urinary system malformation; ARB, angiotensin receptor blocker.

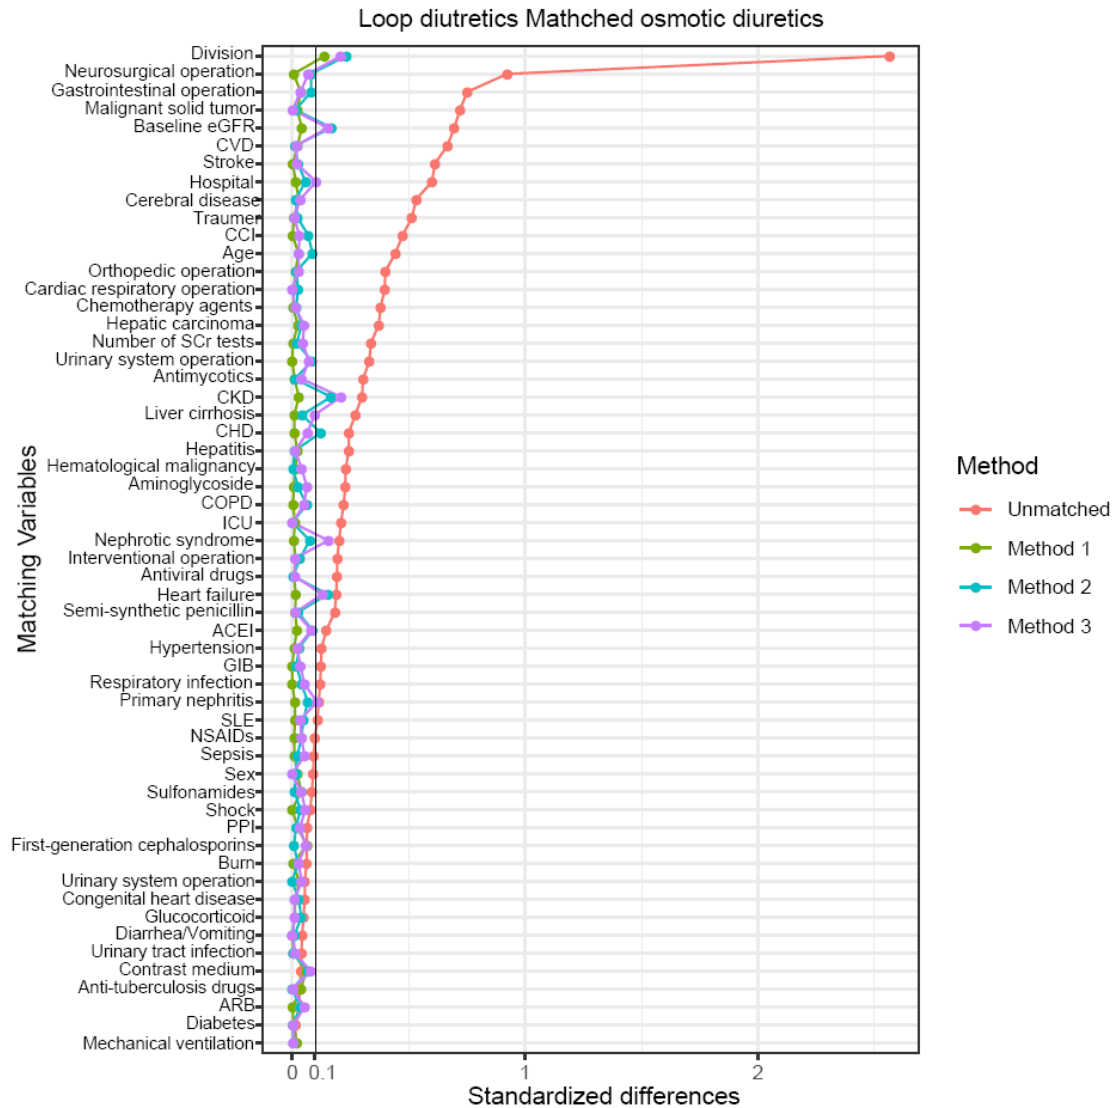

**Figure S3. Distribution of standardized differences before and after 1:1 propensity score matching by three different models between loop diuretics and osmotic diuretics.** Method 1, nearest-neighbor matching without replacement and within a specified caliper width of 0.001; Method 2, nearest-neighbor matching without replacement and within a specified caliper width of 0.2 times the standard deviation of the logit of the estimated propensity score; Method 3, exact matching of age, sex, ICU, surgery, and nearest-neighbor matching without replacement and within a specified caliper width of 0.2 times the standard deviation of the logit of the estimated propensity score on other covariates. SCr, serum creatinine; CCI, Charlson comorbidity index score; eGFR, estimated glomerular filtration rate; PPI, proton pump inhibitor; ICU, need for admission to the intensive care unit; NSAIDs, non-steroid anti-inflammatory drugs; CKD, chronic kidney disease; COPD, chronic obstructive pulmonary disease; ACEI, angiotensin-converting enzyme inhibitor; GIB, gastrointestinal bleeding; SLE, systemic lupus erythematosus; CHD, coronary heart disease; CVD, cardiovascular disease; CUSM, congenital urinary system malformation; ARB, angiotensin receptor blocker.
